# Supplementary material
Source: PubMed Central journal article supplement (PMC2836706)
Supplement: 0914433107_pnas.200914433SI.pdf [file 0914433107_pnas.200914433SI.pdf]

# Supporting Information

Le et al. 10.1073/pnas.0914433107

## SI Experimental Procedures

**Cell Lines and Hypoxic Exposure.** P493 human lymphoma B cells were maintained in RPMI 1640 with 10% (vol/vol) FBS and 1% (wt/vol) penicillin–streptomycin. P198 human pancreatic cancer cells, RCC4 and RCC4-VHL human renal carcinoma cells, and MCF-7 and MDA-MB-453 breast cancer cells were maintained in high-glucose (4.5 mg/mL) DMEM with 10% (vol/vol) FBS and 1% (wt/vol) penicillin–streptomycin. Nonhypoxic cells (20% (vol/vol) O<sub>2</sub>) were maintained at 37 °C in a 5% (vol/vol) CO<sub>2</sub> and 95% (vol/vol) air incubator. Hypoxic cells (1% O<sub>2</sub>) were maintained in a controlled atmosphere chamber (PLAS-LABS) with a gas mixture containing 1% O<sub>2</sub>, 5% (vol/vol) CO<sub>2</sub>, and 94% (vol/vol) N<sub>2</sub> at 37 °C for the indicated time. Bright live cells were counted daily in a hemacytometer using trypan blue dye to exclude dead cells. All cells were grown at a concentration of 10<sup>5</sup> cells/mL. All drug treatments began at day 0. FX11 was added daily.

**RNA Interference Experiments.** siRNAs targeting human LDHA (ON-TARGETplus SMARTpool) were purchased from Dharmacon Research, Inc. Targeting sequences for LDHA were a pool of the following four target sequences: sequence 1, GGAGAAAGCCGUCUUAUU; sequence 2, GGCAAAGACUAUAUGUAA; sequence 3, UAAGGGUCUUUACGGAAUA; and sequence 4, AAAGUCUUCUGAUGUCAUA. For P493 human lymphoma B cells, transfection of siRNAs was performed using an Amaxa Nucleotransfection device according to the manufacturer's instructions. Briefly, 2 µg of siLDHA ON-TARGETplus SMARTpool or ON-TARGETplus Nontargeting Pool (Dharmacon Research, Inc.) was transfected into 2 × 10<sup>6</sup> cells at 0 h. At 24 h, 10<sup>5</sup> cells were treated with 0.1% DMSO or FX11 for 48 more hours. The remaining cells were harvested for immunoblot analysis. For P198 human pancreatic cancer cells, transfection of siRNAs was performed using X-tremeGENE siRNA Transfection Reagent (Roche) according to the manufacturer's instructions.

**Western Blot Analysis.** Cell pellets were harvested after washing with PBS. Protein concentration was determined by BCA assay (Pierce) and 30 µg of protein per well was separated by SDS/PAGE and transferred by iBlot gel transfer stacks (Invitrogen). Rabbit monoclonal anti-LDHA (Epitomics) was used to detect human LDHA; phosphor-AMP kinase  $\alpha$  and phospho-acetyl-CoA carboxylase antibodies were purchased from Cell Signaling. Membranes were reprobed with anti- $\alpha$ -tubulin as a loading control. The enhanced chemiluminescence reagent ECL (GE Healthcare) was used for detection.

**Oxygen Consumption.** Oxygen consumption was measured using a Clark-type oxygen electrode (Oxytherm System; Hansatech Instruments Ltd). Then, 5 × 10<sup>6</sup> cells in 1 mL of medium were placed in the chamber above a membrane that is permeable to oxygen. Oxygen diffuses through the membrane and is reduced at the cathode surface so that a current flows through the circuit, which is completed by a thin layer of KCl solution. The current that is generated bears a direct stoichiometric relation to the oxygen reduced and is converted to a digital signal. Determinations were done in triplicate, and the entire experiment was done twice.

**ROS Measurement by Flow Cytometry.** Intracellular ROS production was measured by staining cells with 5-(and-6)-carboxy-2',7'-dichlorodihydrofluorescein diacetate (carboxy-H<sub>2</sub>DCFDA; Molecular Probes) according to the manufacturer's instructions. Next, 10<sup>5</sup> cells/mL were treated with 9 µM FX11 or 0.5 nM

FK866 for 24 h. Stained cells were analyzed in FACScan flow cytometers (BD Bioscience).

**Annexin V Assay.** After 24 h of FX11 treatment, cells were harvested and washed twice with cold PBS and the assay was performed using the Annexin V–7-AAD apoptosis detection Kit I (BD Biosciences Pharmingen) according to the manufacturer's instructions.

**Determination of K<sub>i</sub> and Enzyme Kinetics.** The reaction velocity of purified human LDHA or GAPDH was determined by a decrease or increase, respectively, in absorbance at 340 nm of NADH. The LDHA activity was assessed using the protocol described in the *Worthington Enzyme Manual*, with varying concentrations of NADH. The GAPDH activity was assessed using the protocol described in the *Worthington Enzyme Manual* with varying concentrations of NAD<sup>+</sup>. K<sub>i</sub> values were determined from double-reciprocal plots by linear regression analysis using SigmaPlot Enzyme Kinetic software.

**CarboxyLink Immobilization and Affinity Columns.** FX11 and E molecules that contain carboxyl groups were coupled to immobilized diaminodipropylamine resins according to the manufacturer's instructions (Pierce). About 1.9 mg (95% coupling efficiency) of FX11 or E was coupled to 2 mL of resin as estimated by the amount of either molecule recovered after conjugation. An equal amount of cell lysate was loaded onto these beads and eluted with 1 mM NADH after washing with six column volumes of high salt (1 M NaCl). LDHA activity was performed from the eluates to assess the binding affinity of the molecules with LDHA.

**Mitochondrial Membrane Potential Measurement by Flow Cytometry.** The lipophilic cation dye [JC-1(5,5',6,6'-tetrachloro-1,1',3,3'-tetraethylbenzimidazolcarbocyanine iodide); Invitrogen] was used to detect the loss of the mitochondrial membrane potential. The negative charge established by the intact mitochondrial membrane potential lets the lipophilic dye stain the mitochondria bright red, which emits in channel 2 (FL2). When the mitochondrial membrane potential collapses, JC-1 remains in the cytoplasm in a green fluorescent monomeric emission in channel 1 (FL1). JC-1 reversibly changes its color from green to orange as membrane potentials increase (over values of 80–100 mV). Then, 10<sup>5</sup> cells/mL were treated with 9 µM FX11 and/or FK866 for 24 h. Stained cells were analyzed in FACScan flow cytometers (BD Bioscience).

**Measurement of ATP.** P493 cells were treated with 9 µM FX11 or 0.5 nM FK866 for 20 h and counted. ATP levels were determined by a luciferin–luciferase-based assay (Promega) on aliquots containing equal number of cells according to a standard protocol.

**Determination of NADH/NAD<sup>+</sup> and NADPH/NADP<sup>+</sup> Ratios.** The NADH/NAD<sup>+</sup> and NADPH/NADP<sup>+</sup> ratios were assessed using the protocol described by the manufacturer. The assay is based on an enzyme-catalyzed kinetic reaction in which a tetrazolium dye 3-[4,5-dimethylthiazol-2-yl]-2,5-diphenyltetrazolium bromide is reduced by NAD(P)H in the presence of phenazine methosulfate. The intensity of the reduced product color, measured at 565 nm, is proportionate to the NAD(P)H/NAD(P)<sup>+</sup> concentration in the samples. The NAD(P)H or NAD(P)<sup>+</sup> content of the cells was harvested separately using a corresponding extraction buffer.

**Visualization of NADH Autofluorescence and Emission Scanning.** The NADH content of the cells was analyzed at an excitation wave length of 350 nm (UV) using an argon laser and was collected at 460 nm. The fluorescence emission spectrum of purified NADH, FX11, E, and FK866 was performed in a quartz cuvette with a 10-mm path length using a Quanta Master spectrofluorometer (Photon Technology International).

**Measurement of Lactate Production.** Lactate production was measured by the ABL700 Radiometer analyzer (Radiometer America, Inc.) according to the manufacturer's instructions. A total of  $10^5$  cells were grown at 37 °C in a 5% (vol/vol) CO<sub>2</sub> and 95% (vol/vol) air incubator and treated with 9 μM FX11 or 0.5 nM FK866 for 24 h.

**Glucose Uptake Assay.** A glucose uptake assay was performed using 2-[N-(7-nitrobenz-2-oxa-1,3-diazol-4-yl)amino]-2-deoxy-D-glucose (2-NBDG; Invitrogen) and a fluorescent analogue of 2-deoxyglucose, followed by flow cytometric detection of fluorescence produced by the cells. After 24 h,  $10^5$  cells/mL treated with 10 μM FX11 were incubated with 2-NBDG (100 μM) for 30 min. The 2-NBDG uptake reaction was stopped by removing the incubation medium and washing the cells with precold PBS. Vital dye 7-amino-actinomycin (7-AAD) was added to distinguish the viable cell population. For each measurement, data from 10,000 single-cell events were collected using FACScan flow cytometers (BD Bioscience).

**Immunohistochemistry and Immunofluorescence Staining.** Tumor and organ hypoxic areas were detected by pimonidazole hydrochloride (Hypoxyprobe) from Natural Pharmacia International. Hypoxyprobe (1.5 mg) diluted in 150 μL of 0.9% saline was given via i.p. injection 1 h before tumors were rapidly harvested and fixed in 10% (wt/vol) neutral formalin buffer. Aqua DePar and Bord De-cloaker RTU (Biocare Medical) were used according to the two-step deparaffinization and heat retrieval protocol of the manufacturer. Protein adducts of reductively activated pimonidazole were detected by rabbit anti-Hypoxyprobe antibody. The immunohistochemical reaction was visualized by diaminobenzidine (Dako). The immunofluorescence reaction was visualized by Texas-red goat anti-rabbit antibody (Invitrogen). Samples were analyzed under an Axiovert 200 (Zeiss) fluorescence microscope at ×10 magnification.

**Animal Studies.** The animal studies were performed according to the protocols approved by the Animal Care and Use Committee at The Johns Hopkins University. To generate tumorigenesis study in xenograft model,  $2.0 \times 10^7$  P493 human lymphoma B cells or  $5 \times 10^6$  human pancreatic cancer cells were injected s.c. into male SCID mice (National Cancer Institute) or athymic Hsd: RH-Foxn1nu mice (Harlan), respectively, as previously

described (1, 2). When the tumor volume reached 200 mm<sup>3</sup>, groups of five mice were injected with control 2% (vol/vol) DMSO or 42 μg of FX11 and/or 100 μg of FK866. The tumor volumes were measured using digital calipers after 4, 7, and 10 days of treatment. Tumor volumes were calculated using the following formula: [length (mm) × width (mm) × width (mm) × 0.52]. The entire experiment was repeated seven times.

**Statistical Analysis.** The CI-50 was calculated using R 2.9.1 software (Bell Laboratories) by least-squares fitting of the data points using formulas shown here. Values are shown as mean ± SD or SEM. Data were analyzed by *t* test and confirmed by R 2.9.1 software. Significance was defined as *P* < 0.05.

**Calculation of CI-50 for the Combination of FX11 and FK866.** To estimate synergy, we fit cell count data gathered on day 2 to the following dose–response model:

$$\text{Count} = \text{Co}\{1 - I_{\max}[E1 + E2 - (1 - s)E1E2]\}$$

where Count is cell counts, Co is the estimated cell counts in the control case (without either drug);  $I_{\max}$  is the maximum inhibition attainable on that day; E1 is the effect from drug 1 (FX11) alone [ $E1 = D1/(IC50_1 + D1)$ ], E2 is the effect from drug 2 (FK866) alone [ $E2 = D2/(IC50_2 + D2)$ ], *s* is a synergy parameter, and IC50<sub>1</sub> and IC50<sub>2</sub> are the amounts of drug 1 (D1 and D2) that yield 50% of their maximum inhibitory effect.

The fit was calculated using the nonlinear least squares library (3) in R (4) and yielded the following parameter estimates:

With these parameter values, we checked synergy via the “Loewe Additivity” (5), finding the drug fraction (*f*<sub>50</sub>) of each

| Parameter                 | Estimate | SE     | <i>P</i> |
|---------------------------|----------|--------|----------|
| Co                        | 52.9     | 3.82   | 3.19e-13 |
| $I_{\max}$                | 0.743    | 0.0567 | 1.05e-12 |
| IC50 <sub>1</sub> (FX11)  | 4.56     | 1.77   | 0.017    |
| IC50 <sub>2</sub> (FK866) | 0.00445  | 0.0019 | 0.027    |
| <i>s</i>                  | 0.252    | 0.112  | 0.033    |

drug's IC50 that, in combination together in the model, yields 50% of maximum inhibition:

$$CI - 50 = f + f = 0.78$$

This value of CI-50 is less than 1.0, the fraction of IC50 of a single drug that would achieve 50% of maximum inhibition. We therefore conclude that the two drugs are synergistic.

- Feldmann G, et al. (2007) Blockade of hedgehog signaling inhibits pancreatic cancer invasion and metastases: A new paradigm for combination therapy in solid cancers. *Cancer Res* 67:2187–2196.
- Gao P, et al. (2007) HIF-dependent antitumorigenic effect of antioxidants in vivo. *Cancer Cell* 12:230–238.

- Bates DM and Chambers JM (1992) in *Statistical Models in S*, eds Chambers JM and Hastie JM (Wadsworth & Brooks/Cole, Belmont, CA), pp 421–454.
- Ihaka R, Gentleman R (1996) R: A language for data analysis and graphics. *Journal of Computational and Graphical Statistics* 5:299–314.
- Loewe S, Muischnek H (1926) Über Kombinationswirkungen. *Arch Exp Pathol Pharmacol* 114:313–326.

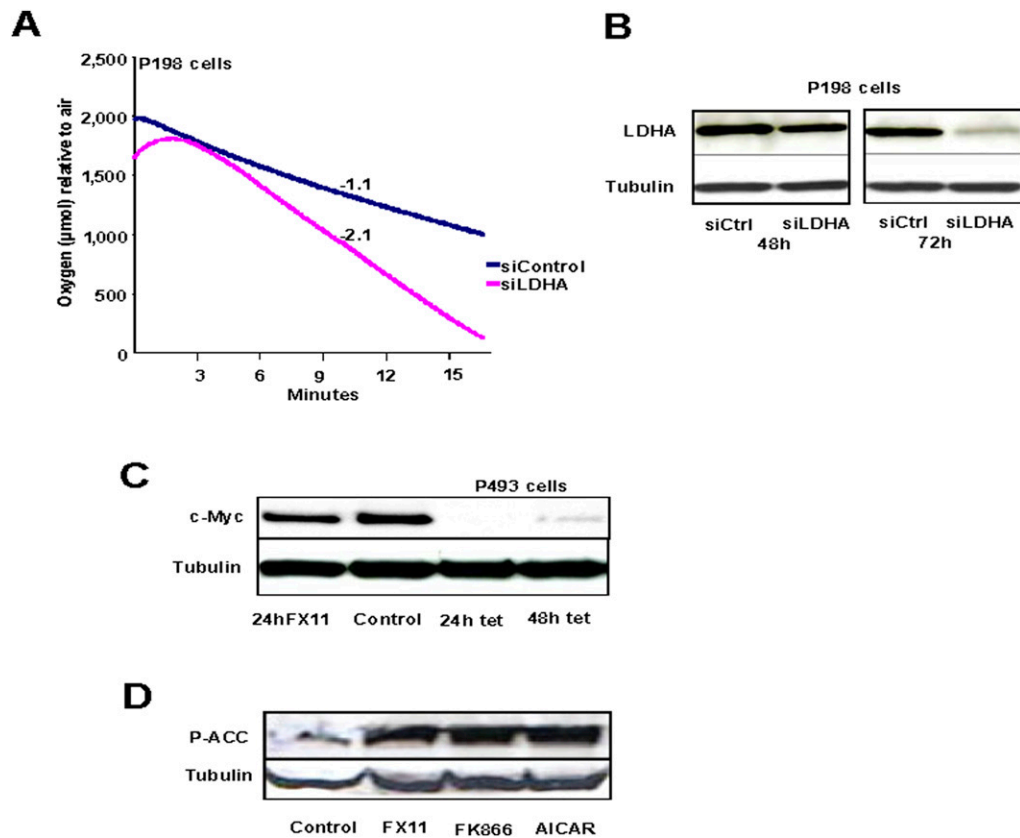

**Fig. S1.** (A) Effect of reduced LDHA expression by siRNA on oxygen consumption in P198 human pancreatic cancer cells. Oxygen consumption was determined by the use of a Clark-type oxygen electrode at 72 h posttransfection with siLDHA (slope =  $-2.1$ ) or siControl (slope =  $-1.1$ ). (B) Immunoblotting was performed on whole-cell lysates, probed with rabbit monoclonal anti-LDHA antibody, and reprobed with anti- $\alpha$ -tubulin as a loading control. (C) FX11 does not affect c-Myc levels in P493 cells. Tetracycline, known to repress c-Myc expression, was used as a control. Equivalent amounts of proteins were immunoblotted with anti-c-Myc antibody, and  $\alpha$ -tubulin served as a loading control. (D) Activation of phospho-acetyl-CoA carboxylase (P-ACC) in lysates of cells treated with FX11 or FK866. Western blot analysis was performed after 24 h of treatment. Equivalent amounts of proteins were immunoblotted with anti-P-ACC, and  $\alpha$ -tubulin served as a loading control.



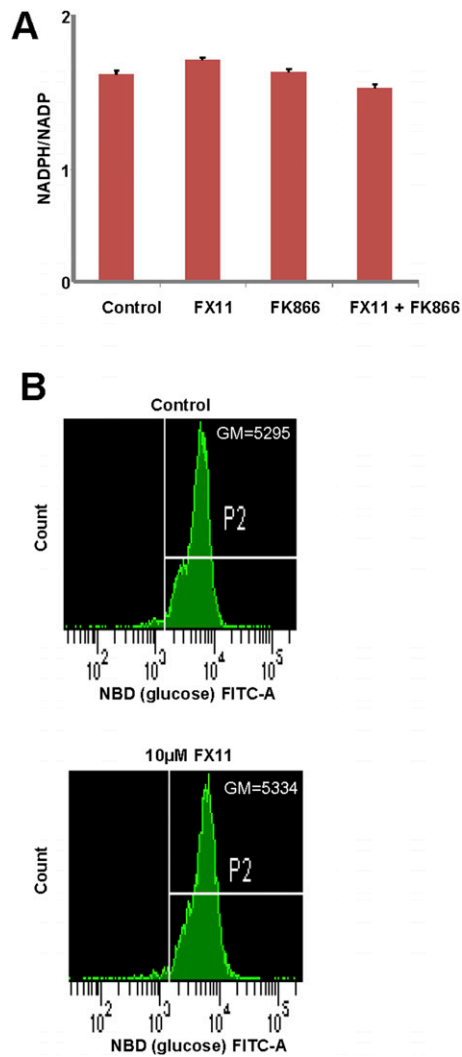

**Fig. S3.** (A) FX11 and/or FK866 effects on NADPH/NADP<sup>+</sup> ratio. P493 cells were treated with 10 µM FX11 and/or 0.1 nM FK866 for 24 h before the NADPH/NADP ratio was assayed. FX11 treatment compared with the control ( $P = 0.8$ ) and FK866 treatment compared with the control ( $P = 0.9$ ). (B) Effects of FX11 treatment on glucose uptake by P493 cells. A fluorescent analogue of 2-deoxyglucose (2-NBDG) was used to assay the glucose uptake of P493 cells, followed by flow cytometry. Viable cells taking up glucose were determined by negative 7-AAD and positive 2-NBDG. The number in each panel indicates the geometrical mean of green fluorescence intensity (520 nm) of the cell population.
